# Supplementary material
Source: Atypon-hosted journal article supplement (https://council.busan.go.kr/assem/user/assem/minute/downloadSupplementfile.busan?minuteFileSid=23502&supplementFile=40)
Supplement: downloadSupplementfile.busan [file downloadSupplementfile.busan]

## Sheet: 총괄
2019. 제2회 추경예산안 계수조정 총괄
											(단위:천원)
회 계 별			예산안 (A)	세 입			세 출				조정결과 (I=A+D)
				삭 감 (B)	증 액 (C)	증 감 (D=C-B)	삭 감 (E)	증 액		증 감 (H=D)
								사 업 비 (F)	예 비 비 (G)
합계			12590075792	0	0	0	#REF!	#REF!	73677	#REF!	12590075792
일반회계			9559555644	0	0	0	473677	400000	73677	0	9559555644
특별회계			3030520148	0	0	0	#REF!	#REF!	0	#REF!	#REF!
	공기업특별		827894827	0	0	0	0	0	0	0	827894827
		수도사업	443619040	0	0	0	0	0	0	0	443619040
		하수도	384275787	0	0	0	0	0	0	0	384275787
	기타특별		2202625321	0	0	0	#REF!	#REF!	0	#REF!	#REF!	#REF!
		집단에너지공급	24950141	0	0	0	0	0	0	0	24950141
		경륜사업	36650378	0	0	0	0	0	0	0	36650378
		의료급여 기금	926969143	0	0	0	0	0	0	0	926969143
		교통사업	87308400	0	0	0	#REF!	#REF!	0	#REF!	#REF!
		광역교통 시설	22810443	0	0	0	0	0	0	0	22810443
		공영차고지조성사업	2215344	0	0	0	0	0	0	0	2215344
		도시철도 사업	531655347	0	0	0	0	0	0	0	531655347
		장기미집행 도시계획시설	115945314	0	0	0	0	0	0	0	115945314
		유료도로	48319949	0	0	0	0	0	0	0	48319949
		원자력발전	35097990	0	0	0	0	0	0	0	35097990
		재정비촉진	14023115	0	0	0	0	0	0	0	14023115
		기반시설	4926459	0	0	0	0	0	0	0	4926459
		화력발전	2558970	0	0	0	0	0	0	0	2558970
		소방사업	301314328	0	0	0	0	0	0	0	301314328
		학교용지부담금	47880000	0	0	0	0	0	0	0	47880000

## Sheet: 일반회계
2019년도 제2회 일반회계 추경예산안 계수조정
						(단위 : 천원)
사업 명세서	목	사 업 명	추경예산안(A)	조정내역		조정결과 (D=A-B+C)
				삭감(B)	증액(C)
일반회계 세입 계			9559555644	0	0	9559555644	0	TRUE	세입-세출	0
					0	0
						0
						0							TRUE	73677
일반회계 세출 계			9559555644	473677	473677	9559555644	0		순순감액	473677	순수증액	400000	예비비	73677	일반세출계 증액 =순순증액+예비비	TRUE
운영위원회				0	0	0
						0
						0
						0
기획행정위원회				13677	0	-13677
162	101-02	기타직보수(시간선택제임기제 나급)	52084	13021	0	39063
162	204-02	직급보조비(시간선택제 나급)	2625	656	0	1969
						0
경제문화위원회				430000	370000	-60000
195	307-02	한아세안정상회의 성공개최기원 불교문화대축제 지원	100000	30000	0	70000
195	308-01	예술과 도시의 섬, 영도	125000	0	10000	135000
195	308-01	예술교육도시 플랫폼 조성사업	150000	0	10000	160000
202	403-01	감전초등학교 다목적 체육관 건립 지원	900000	0	300000	1200000
205	405-01	소장품 구입	300000	300000	0	0
262	403-03	한-아세안 특별정상회의 개최 지원 예비군 지원	400000	100000	0	300000
263	307-02	북한이탈주민 지역적응센터 운영	50000	0	50000	100000
						0
복지환경위원회				0	0	0
						0
						0
						0
						0
						0
						0
해양교통위원회				30000	30000	0
411	401-01	STEM 빌리지 도시계획 변경 용역	70000	0	30000	100000
411	308-10	해양신산업 육성사업(경상) 미래해양도시 부산의 신산업 혁신성장 생태계 조성사업	5460000	30000	0	5430000
						0
						0
						0
도시안전위원회				0	0	0
						0
						0
						0
						0
						0
						0
예비비				0	73677	73677
150	801-01	예비비	0	0	73677	73677

## Sheet: 일반 비목조정
2019년도 제2회 일반회계 추경예산안 계수조정(비목변경)
						(단위 : 천원)
사업 명세서	목	사 업 명	추경예산안(A)	조정내역		조정결과 (D=A-B+C)
				삭감(B)	증액(C)
일반회계 세출 계				7745373	7745373	0
기획행정위원회				900000	900000	0
164	405-01	부산도서관 개관자료 구입	300000	300000		0
164	405-02	부산도서관 개관자료 구입	0		300000	300000
176	301-12	세부사업:소상공인 경쟁력 강화 개별사업:부산상품권 인센티브 보상금	600000	600000	0	0
176	301-12	세부사업:지역사랑상품권 발행 지원 개별사업:부산상품권 인센티브 보상금	0	0	600000	600000
경제문화위원회				5514000	5514000
261	201-03	세부사업:한·아세안 특별정상회의 개최지원 개별사업:한-아세안 특별정상회의 부대행사 관련 추진(선큰가든 재생프로젝트)	100000	100000	0	0
261	201-03	세부사업:한·아세안 특별정상회의 개최지원(보조) 개별사업:한-아세안 특별정상회의 부대행사 관련 추진(선큰가든 재생프로젝트)	0	0	100000	100000
262	308-10	세부사업:한·아세안 특별정상회의 개최지원 개별사업:한-아세안 특별정상회의 부대행사 관련 추진(패션쇼, 팸투어)	450000	450000	0	0
262	308-10	세부사업:한·아세안 특별정상회의 개최지원(보조) 개별사업:한-아세안 특별정상회의 부대행사 관련 추진(패션쇼, 팸투어)	0	0	450000	450000
262	403-02	세부사업:한·아세안 특별정상회의 개최지원 개별사업:한-아세안 특별정상회의 개최 지원 관련 회의장 시설 개보수	4964000	4964000	0	0
262	403-02	세부사업:한·아세안 특별정상회의 개최지원(보조) 개별사업:한-아세안 특별정상회의 개최 지원 관련 회의장 시설 개보수	0	0	4964000	4964000
복지환경위원회				61373	61373	0
309	307-11	청소년 방과후 아카데미 공기청정기 설치 지원(직접)	8800	8800	0	0
309	402-02	청소년 방과후 아카데미 공기청정기 설치 지원(직접)	0	0	8800	8800
309	308-01	청소년 방과후 아카데미 공기청정기 설치 지원(지원)	31680	31680	0	0
309	403-01	청소년 방과후 아카데미 공기청정기 설치 지원(지원)	0		31680	31680
310	307-05	청소년쉼터 공기청정기 설치 지원	10268	10268	0	0
310	402-02	청소년쉼터 공기청정기 설치 지원	0	0	10268	10268
310	308-01	청소년회복지원시설 공기청정기 설치 지원	10625	10625	0	0
310	403-01	청소년회복지원시설 공기청정기 설치 지원	0	0	10625	10625
해양교통위원회				1270000	1270000	0
411	308-10	해양신산업 육성사업(경상) 미래해양도시 부산의 신산업 혁신성장 생태계 조성사업	5430000	1270000	0	4160000
411	403-02	해양신산업 육성사업(자본) 미래해양도시 부산의 신산업 혁신성장 생태계 조성사업	0	0	1270000	1270000
